# Supplementary material
Source: PubMed Central journal article supplement (PMC3266553)

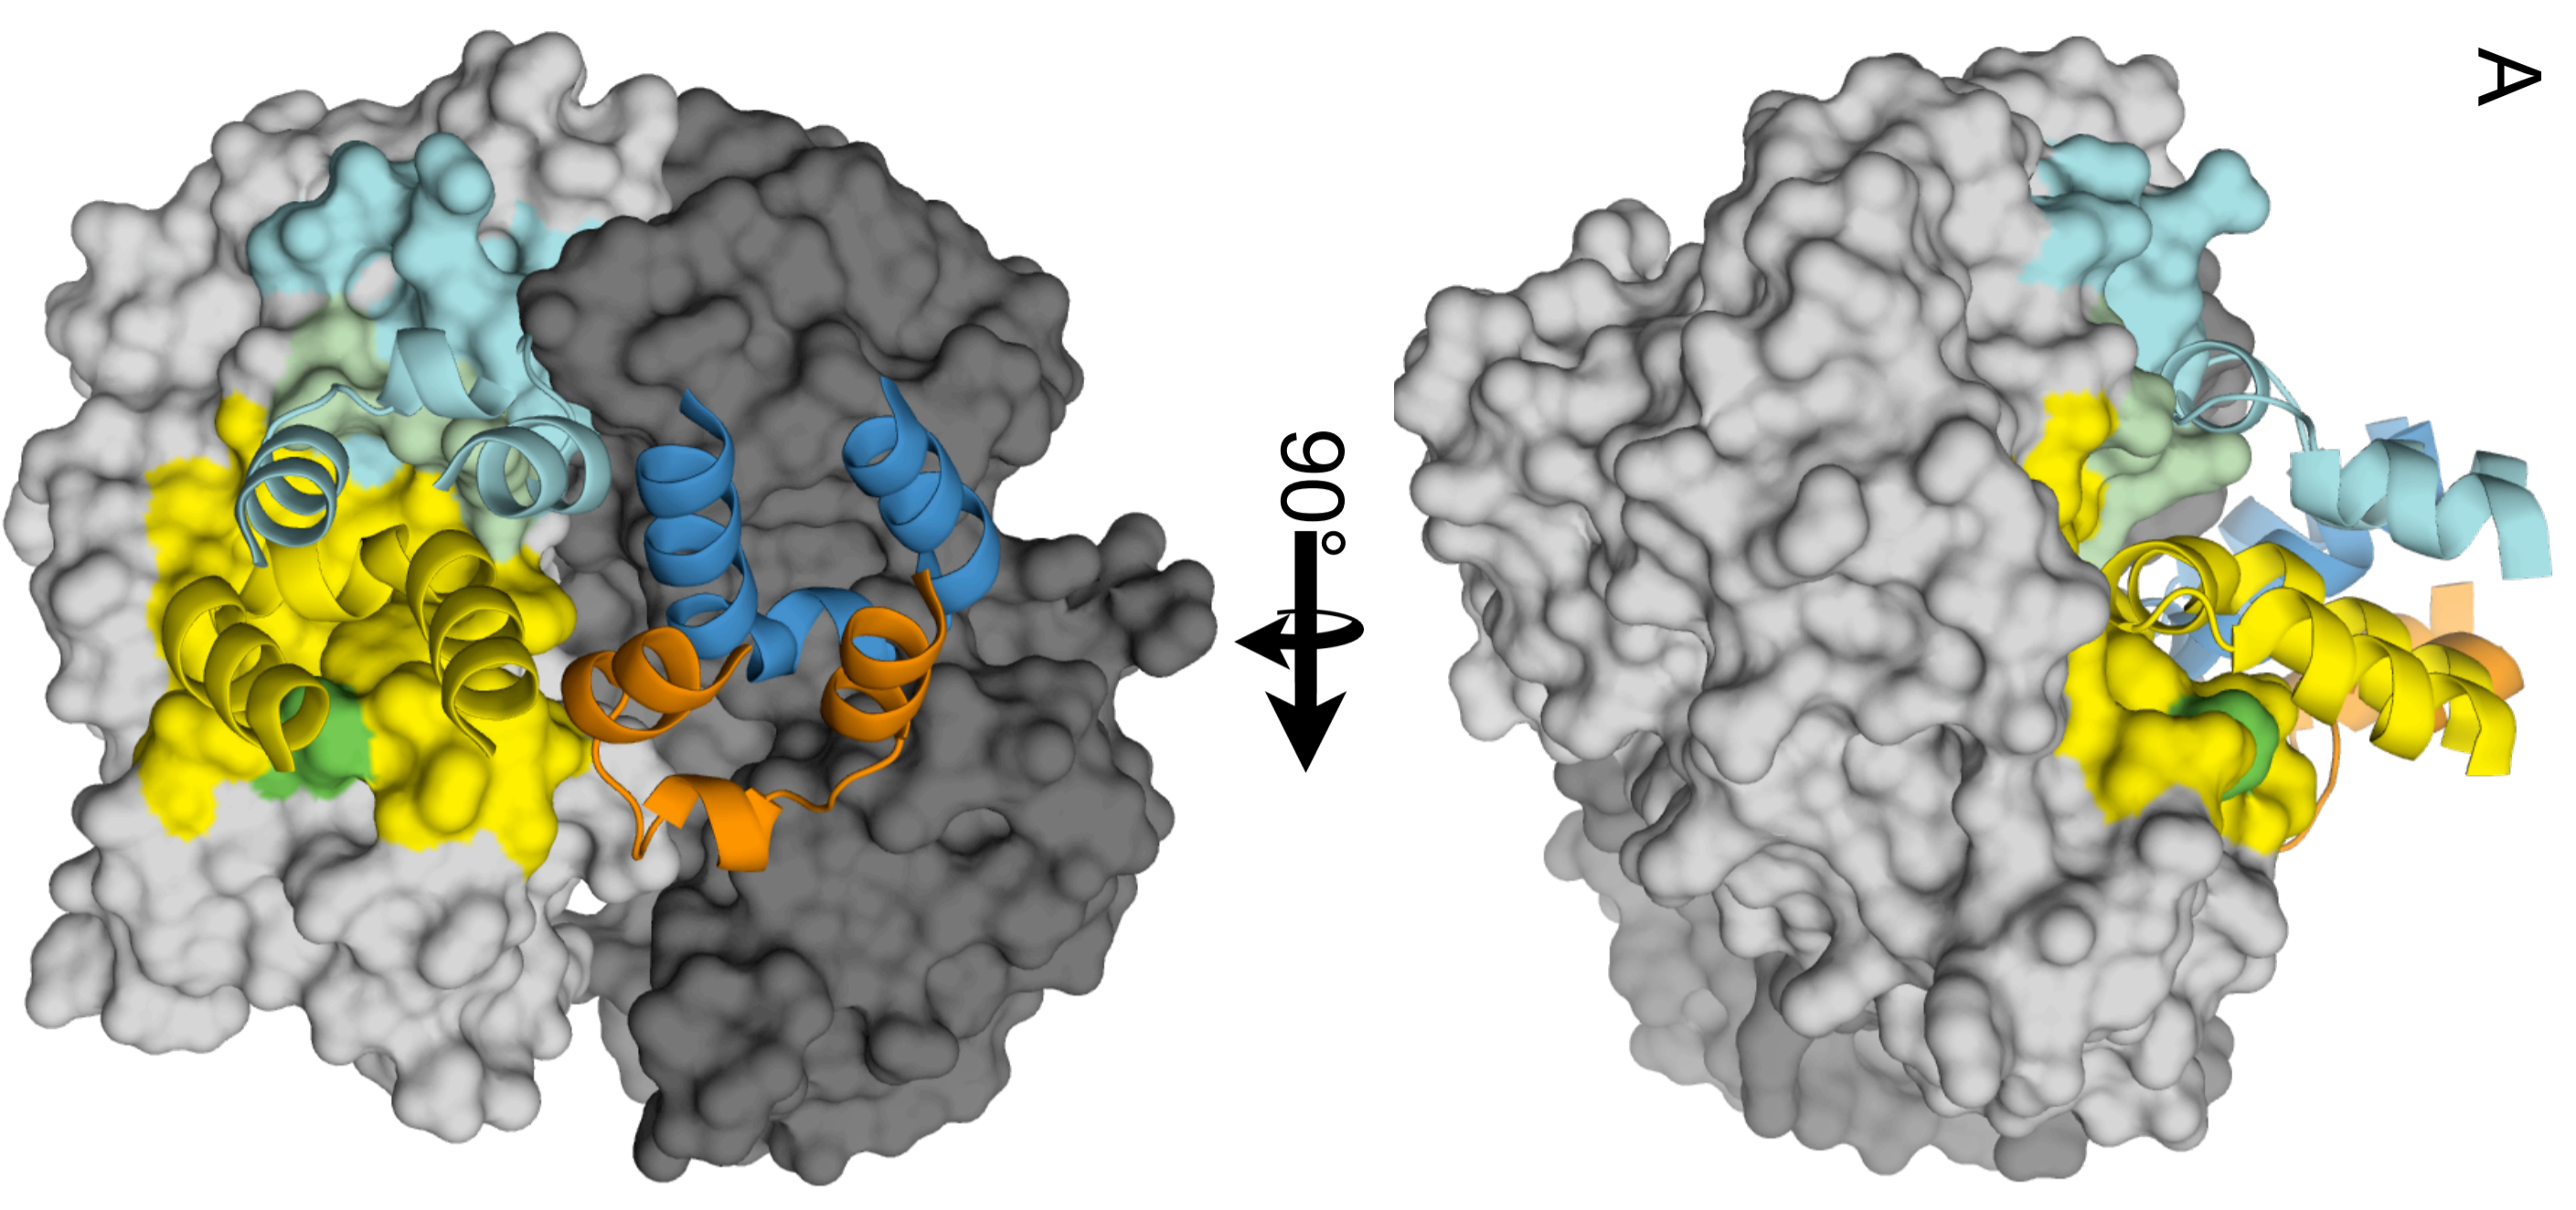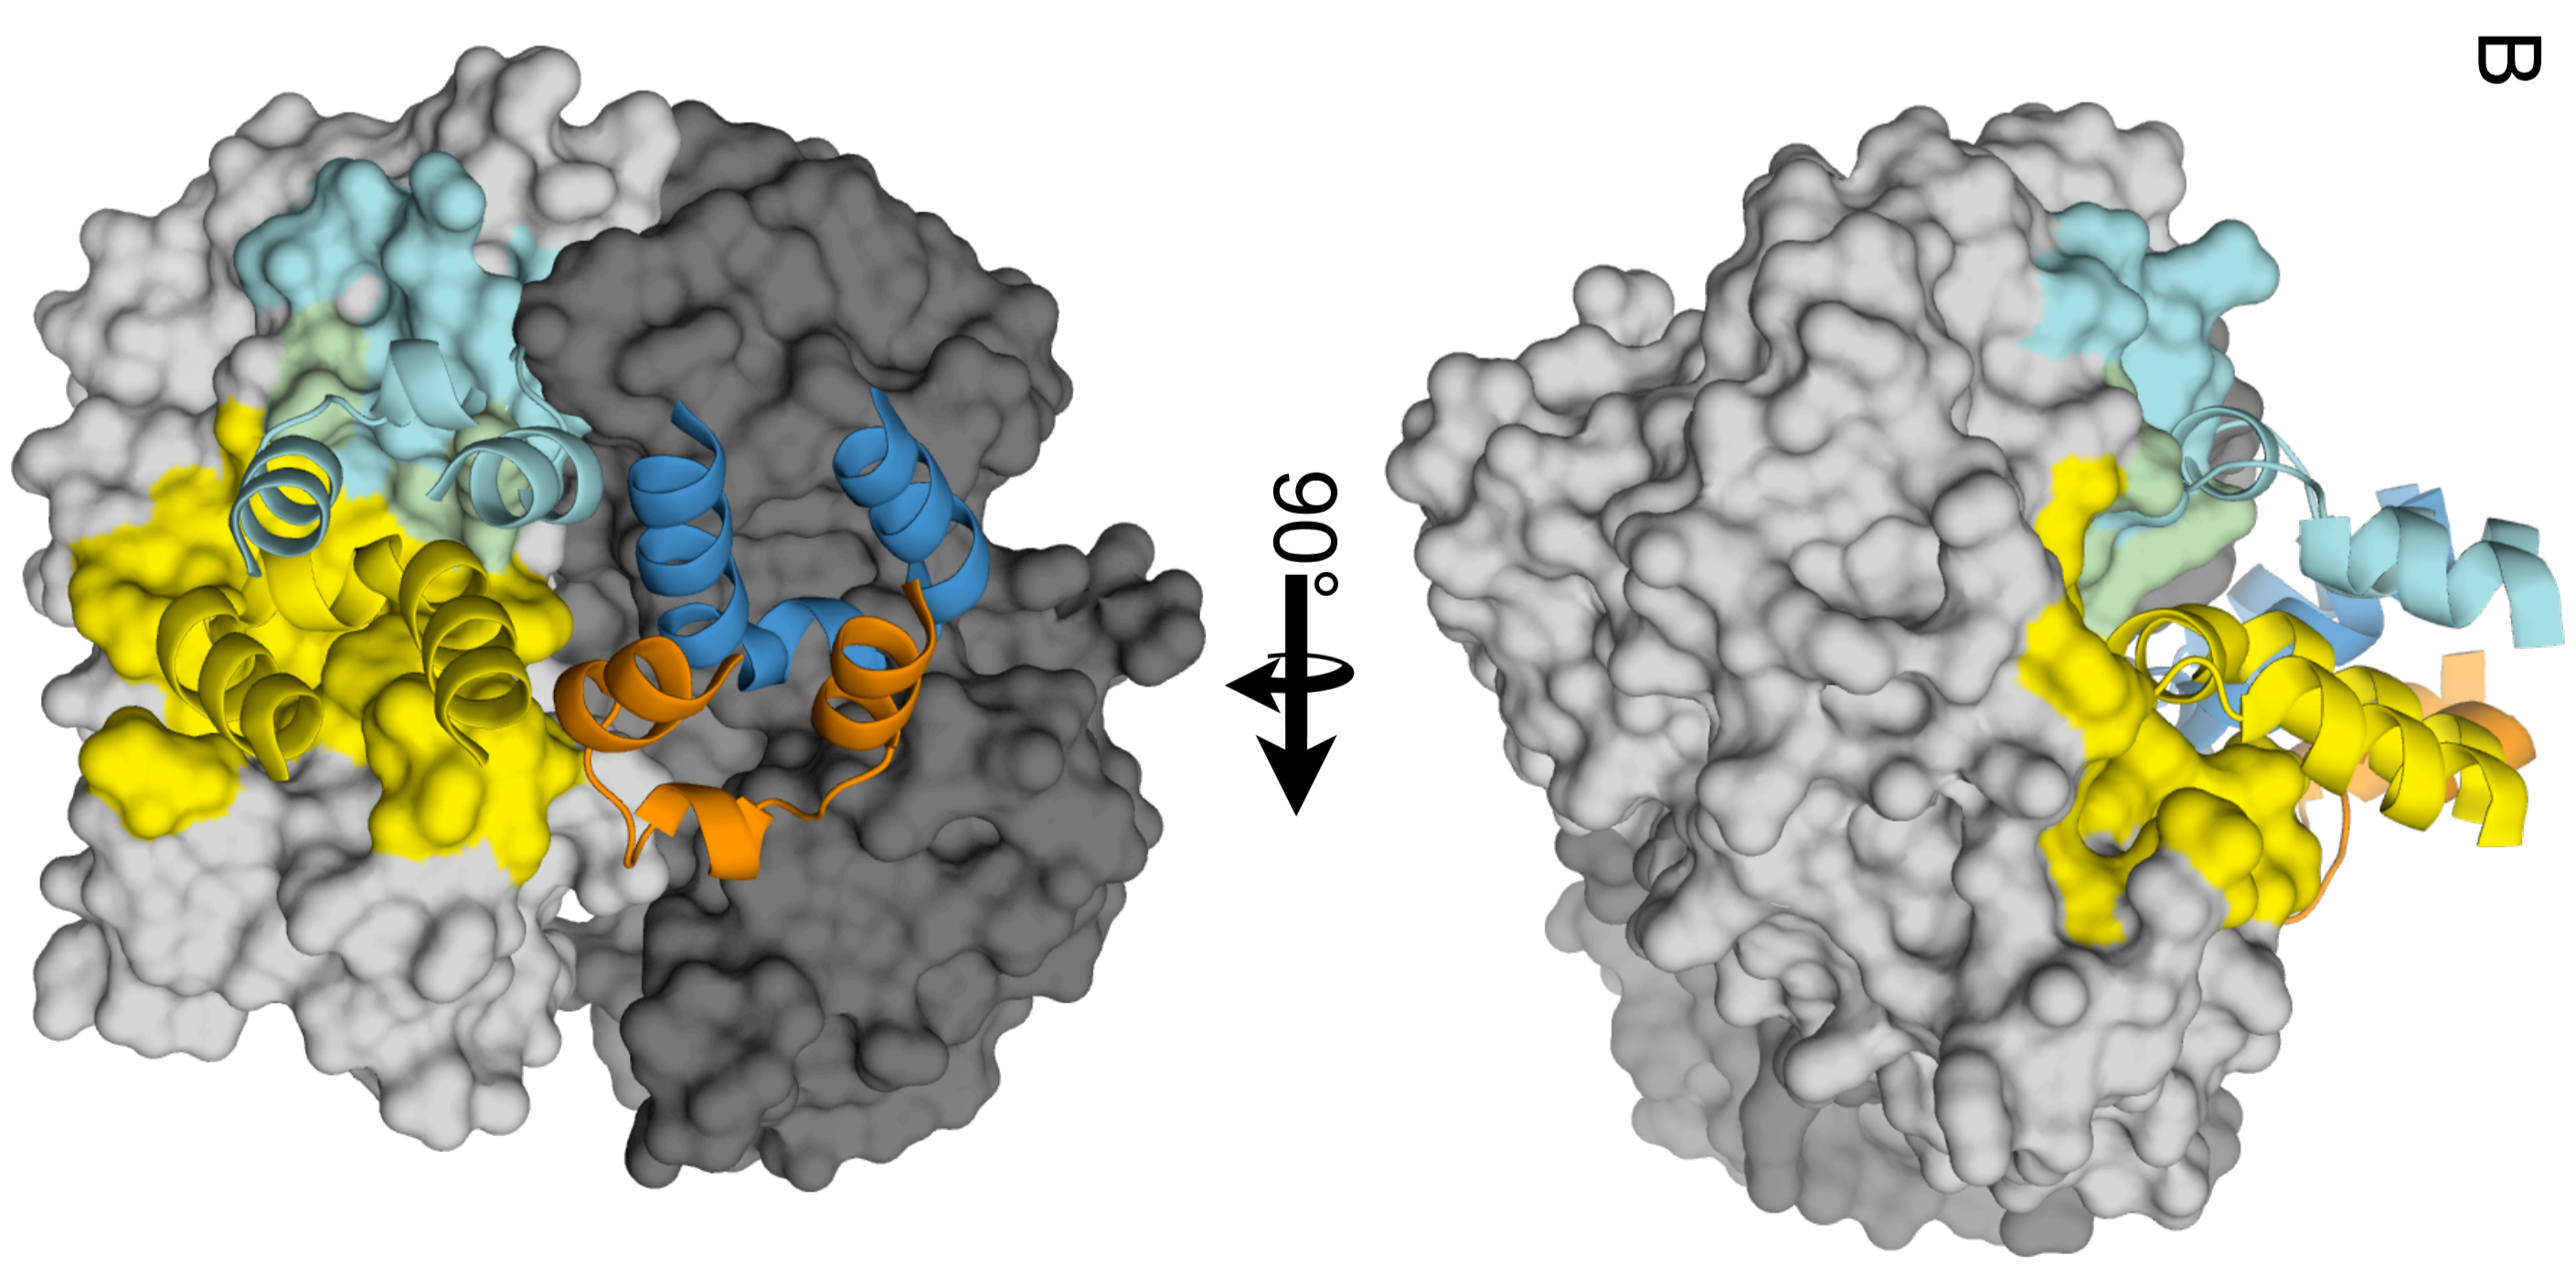

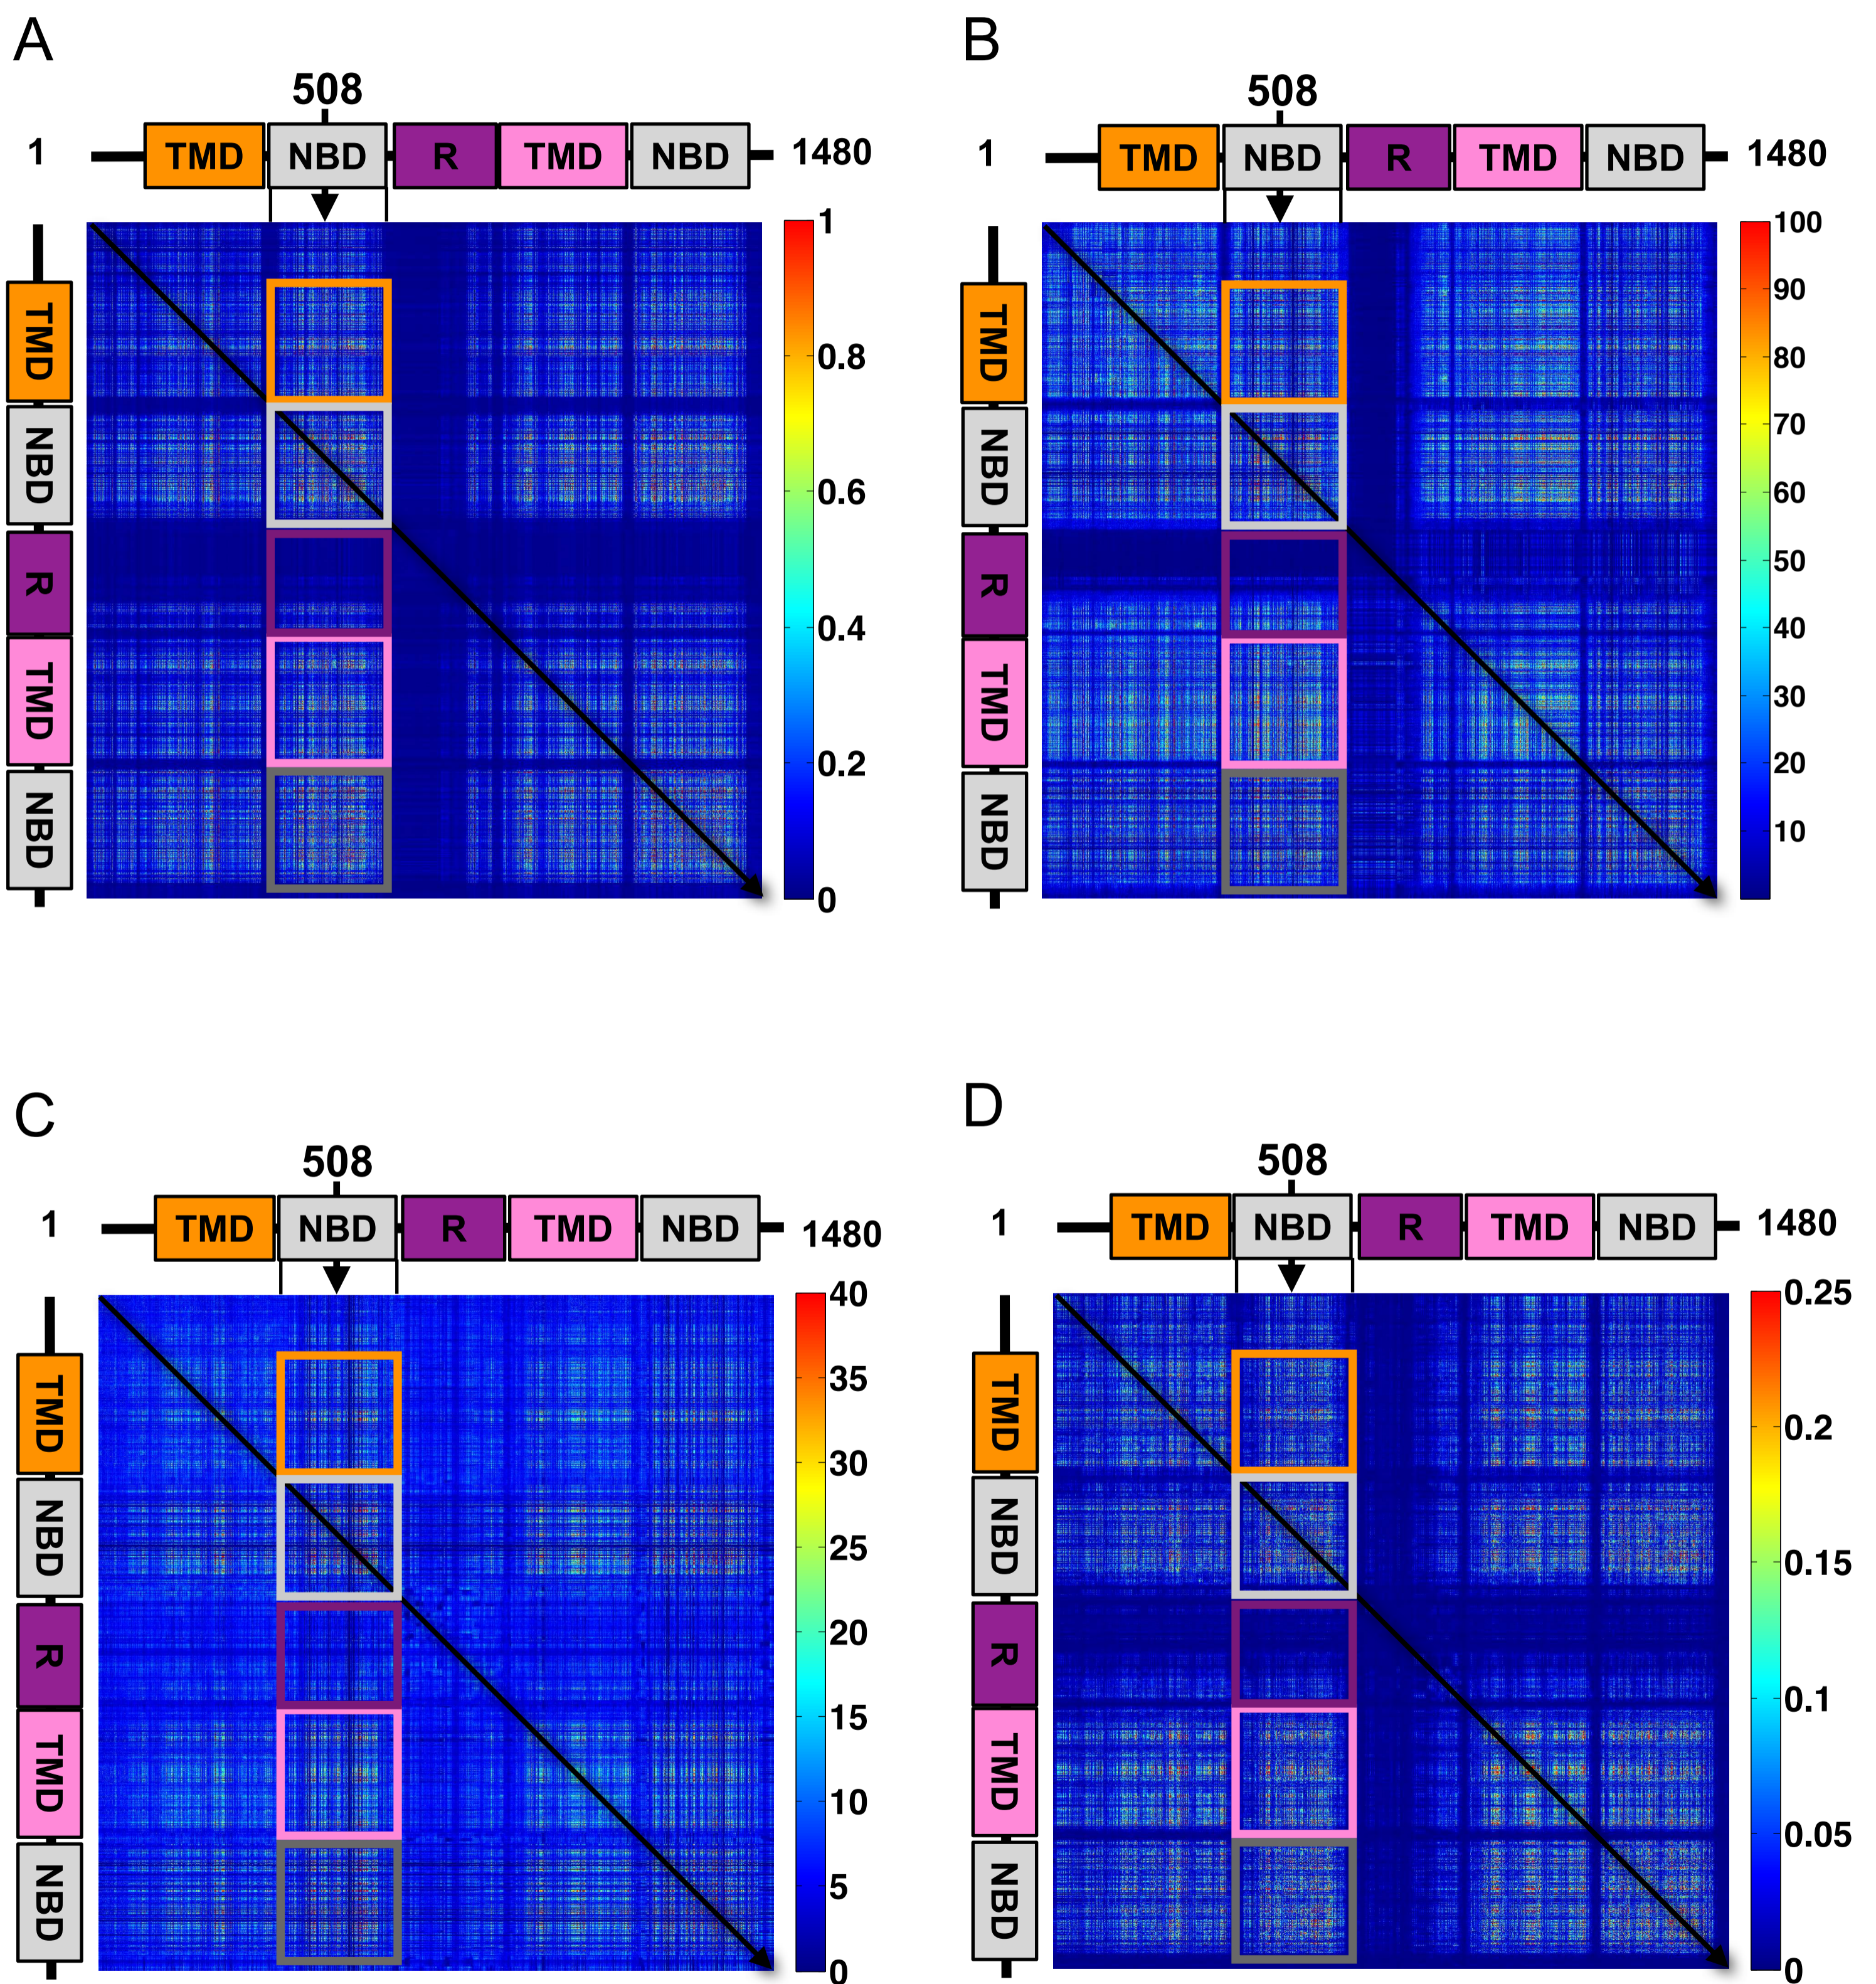

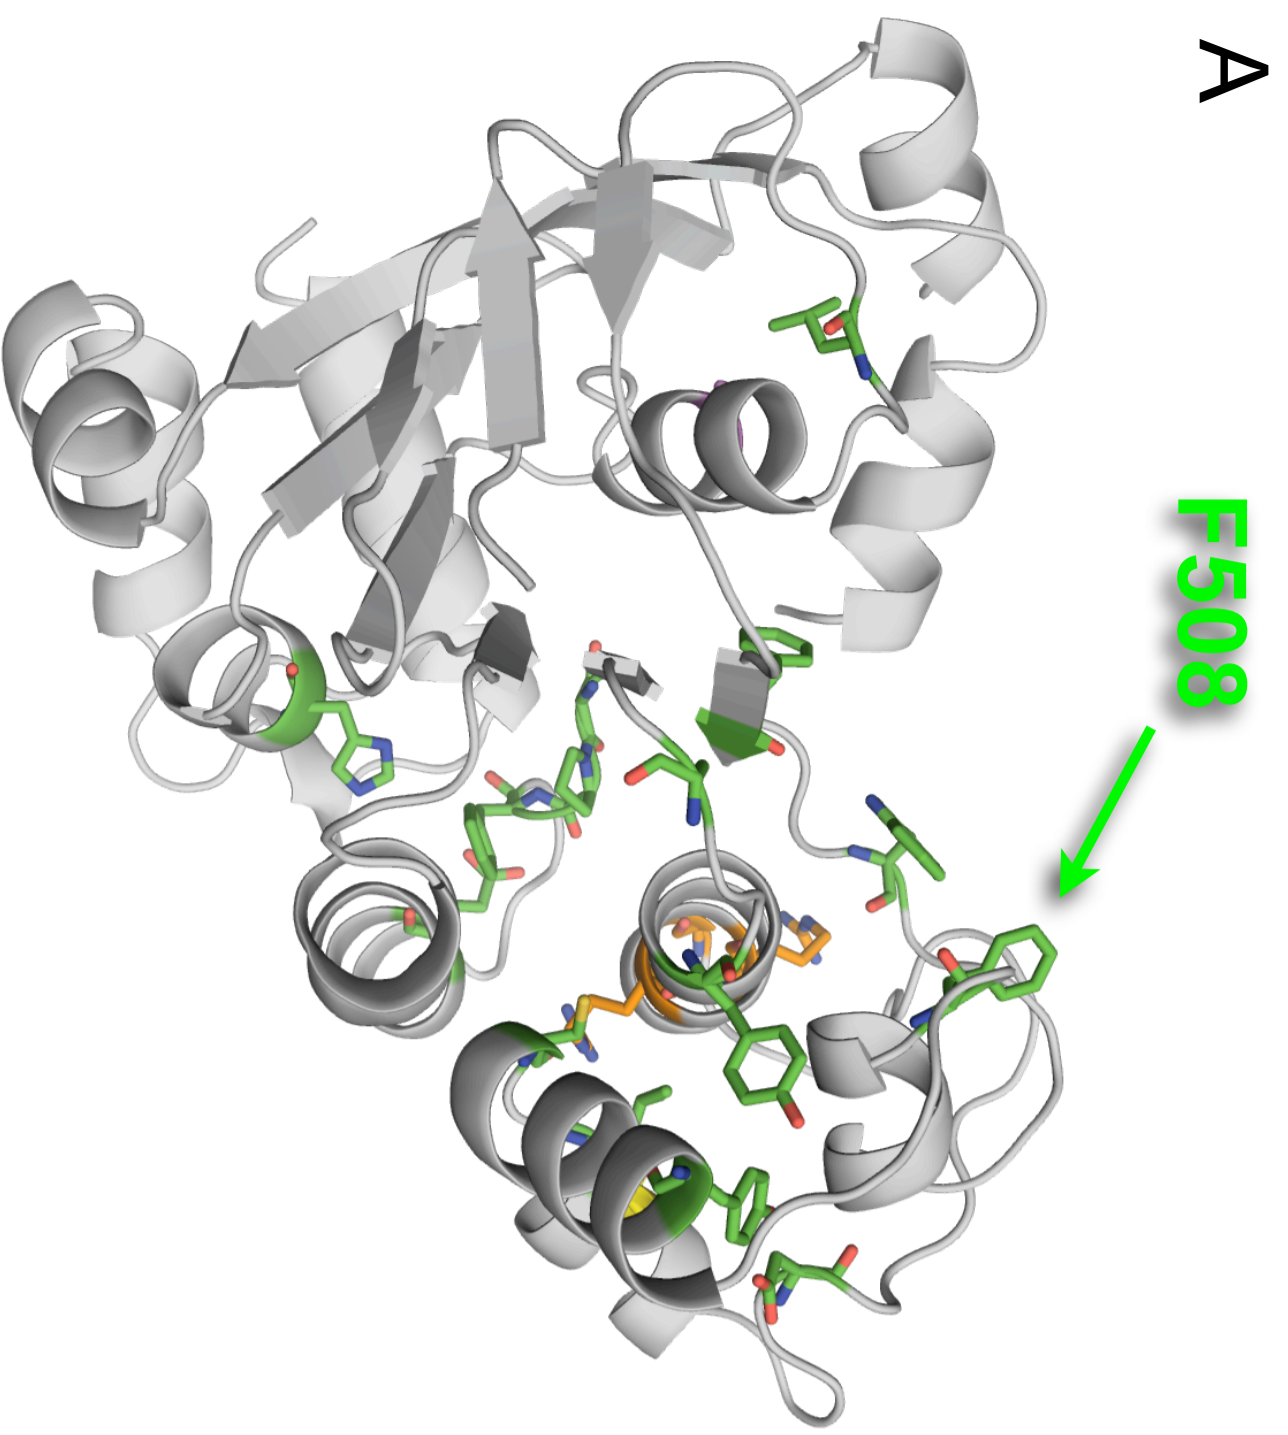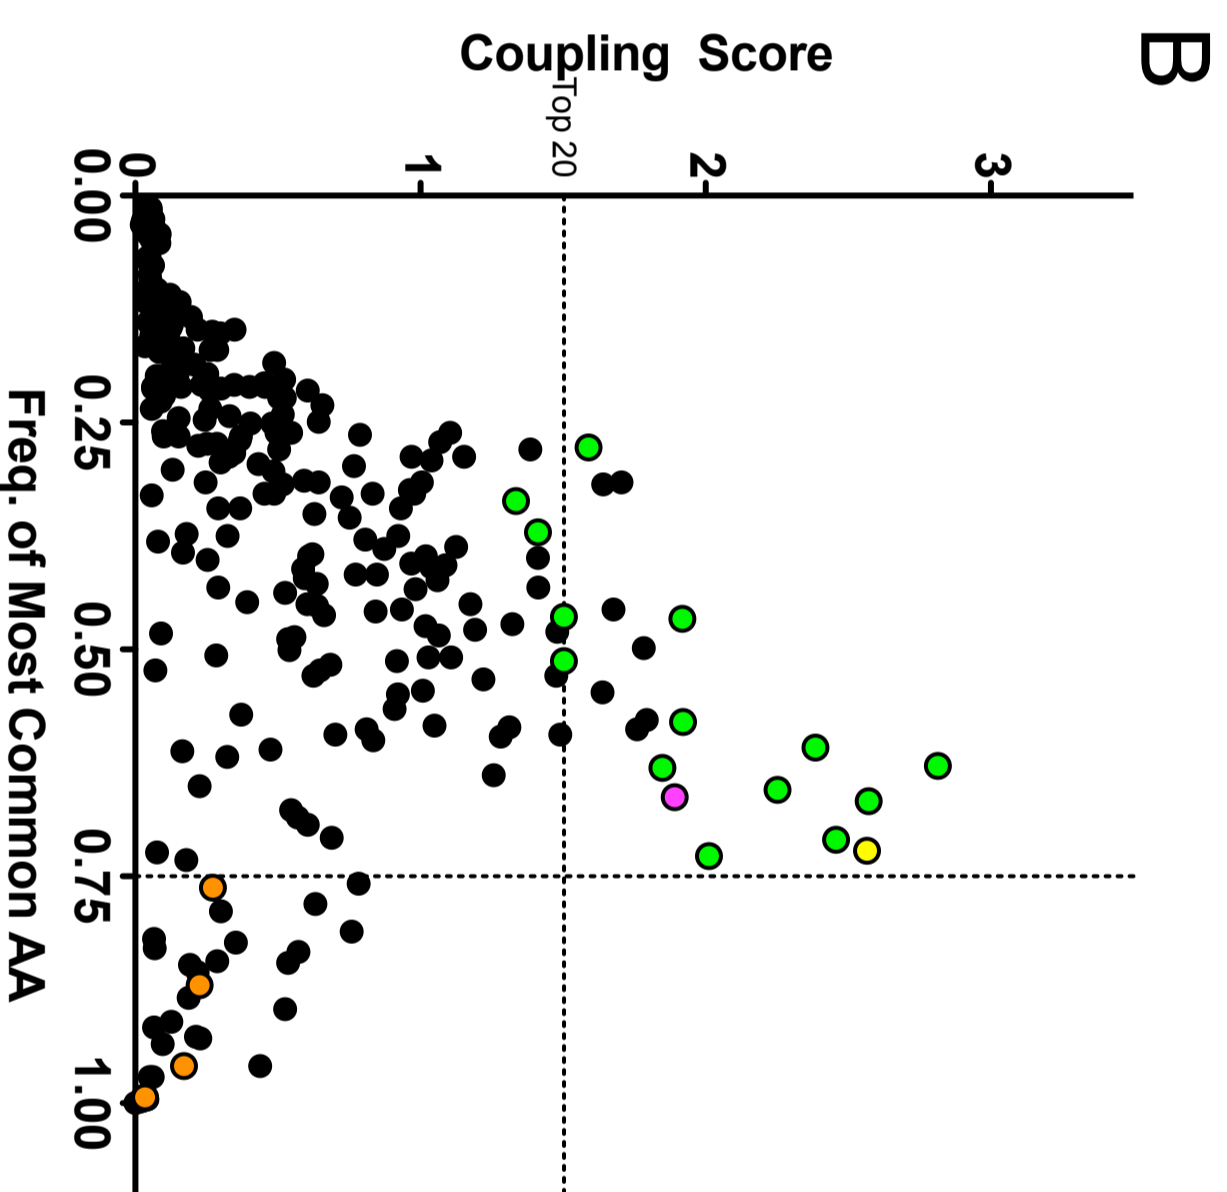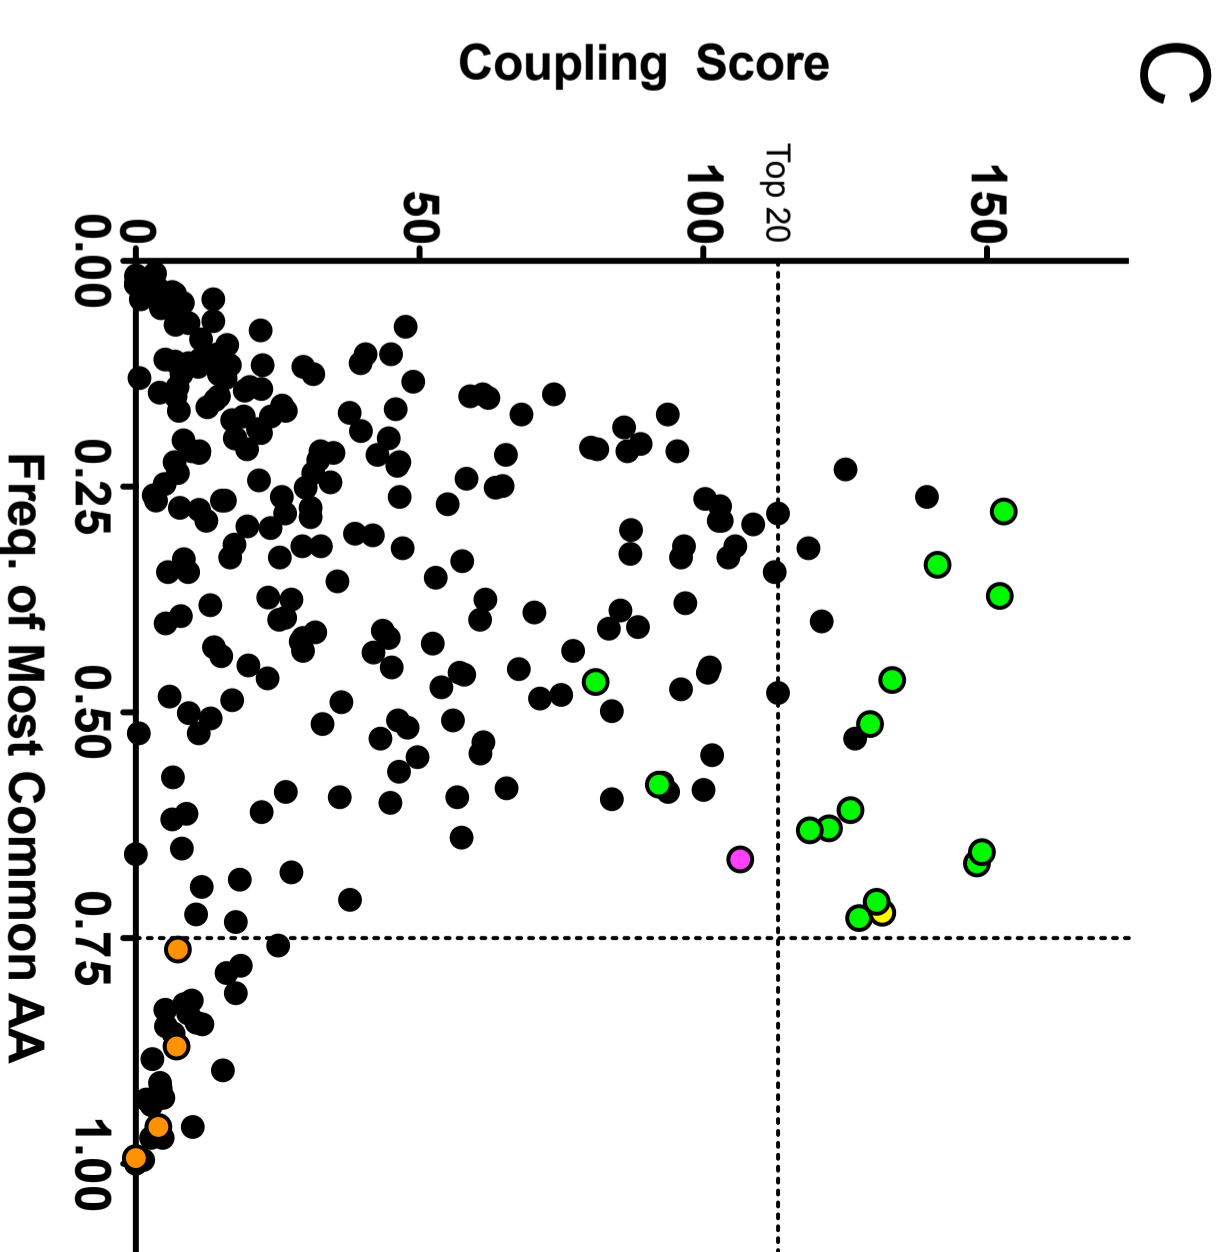

90°

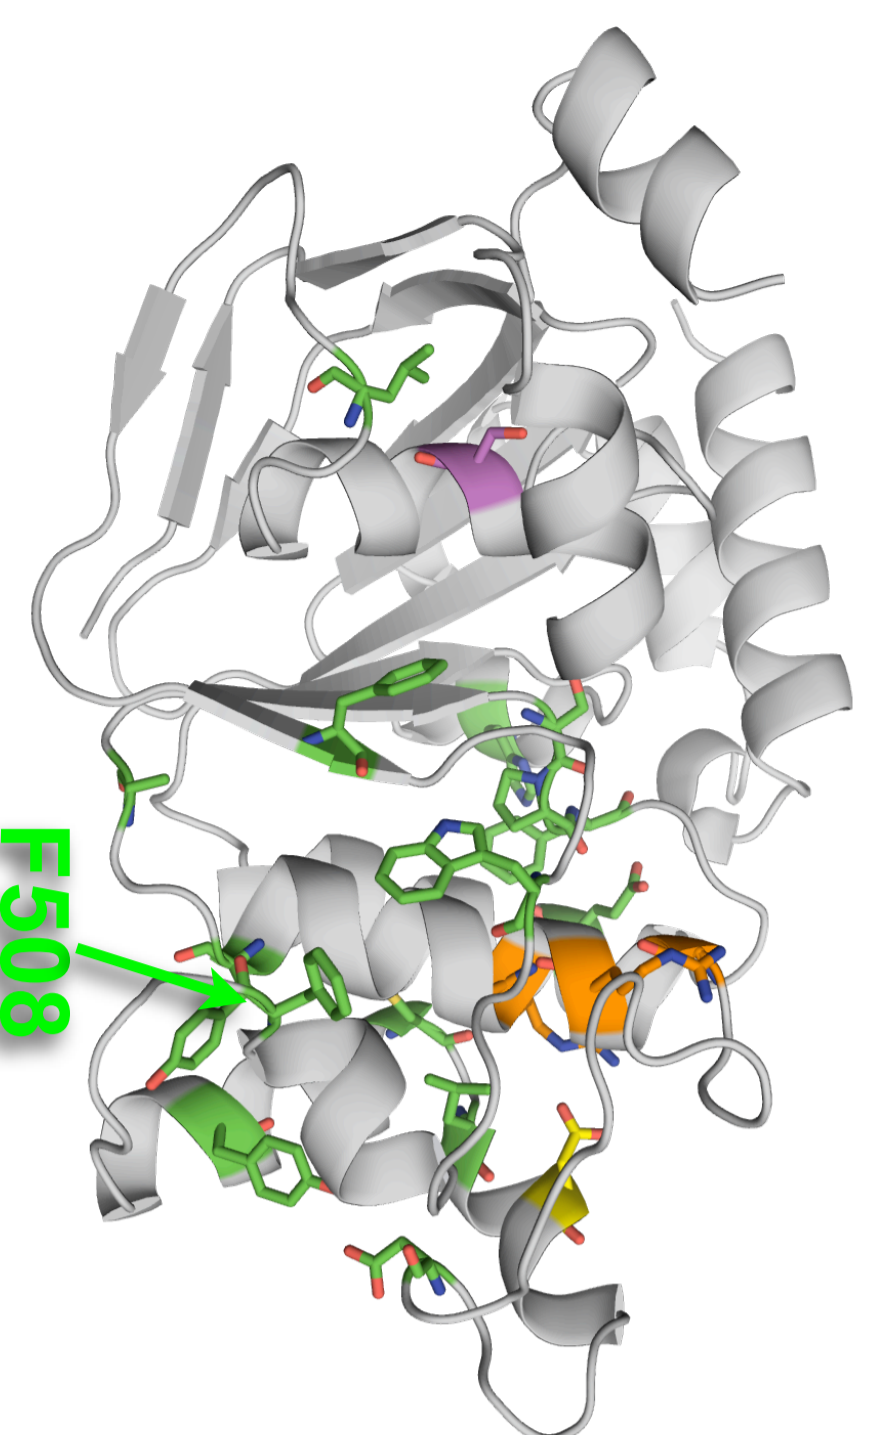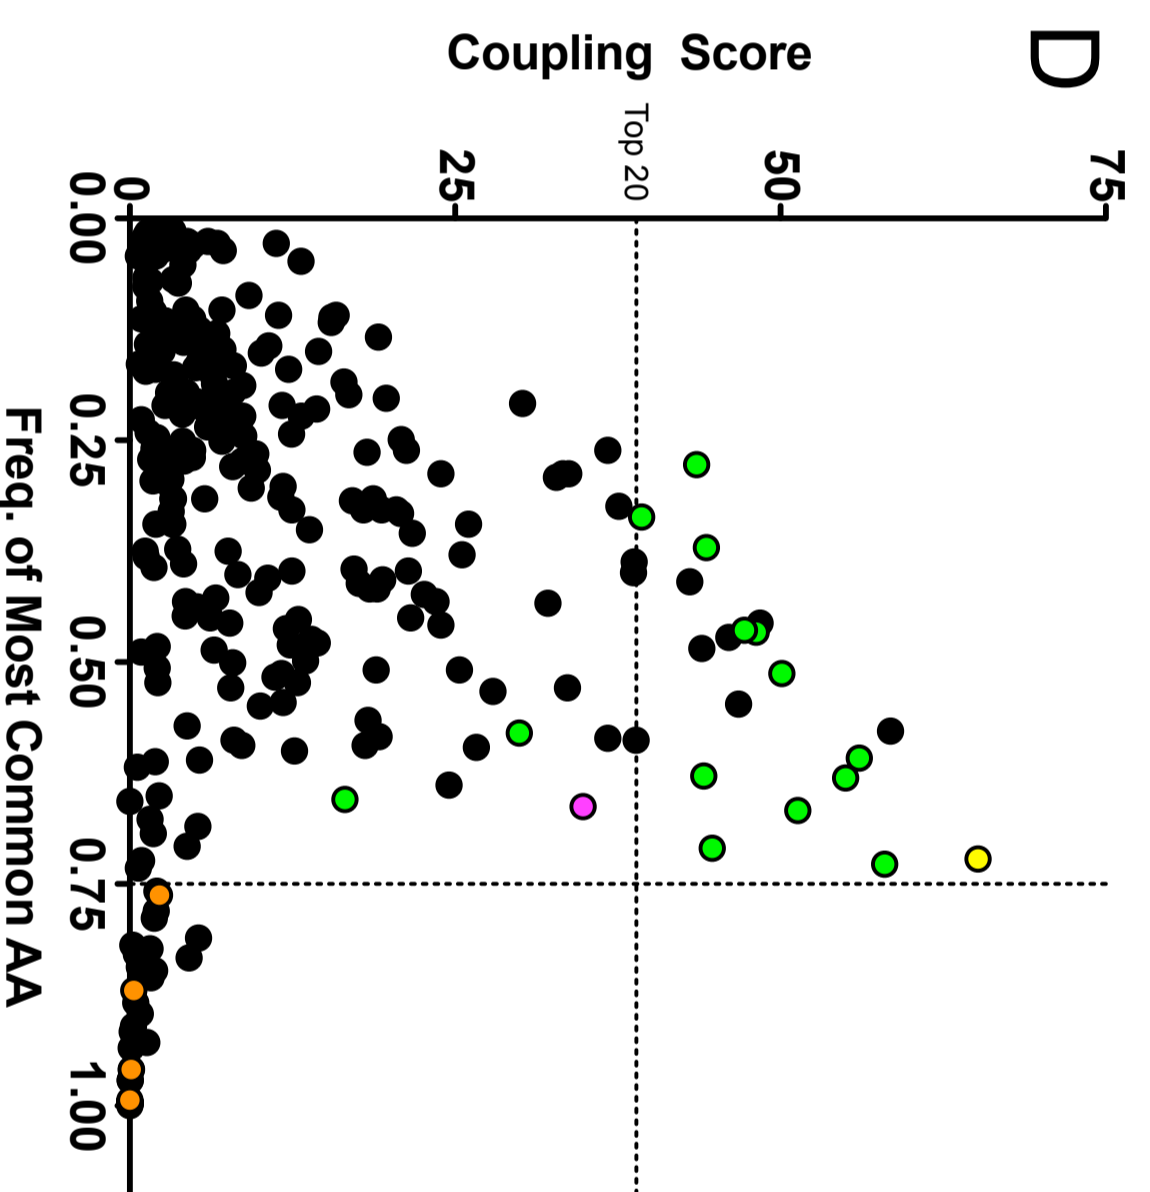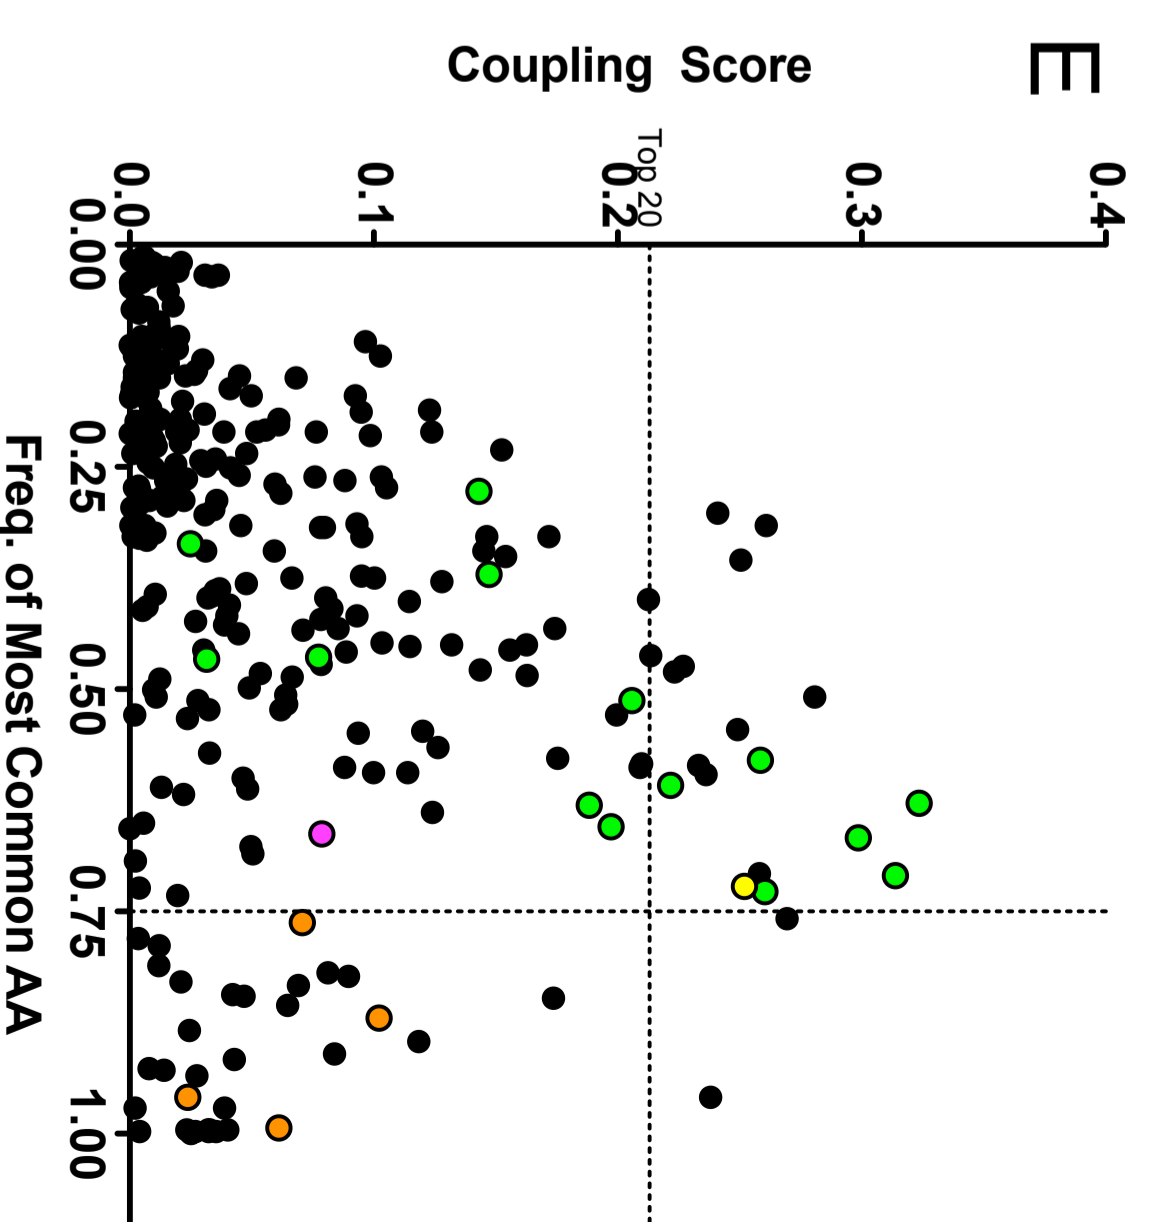

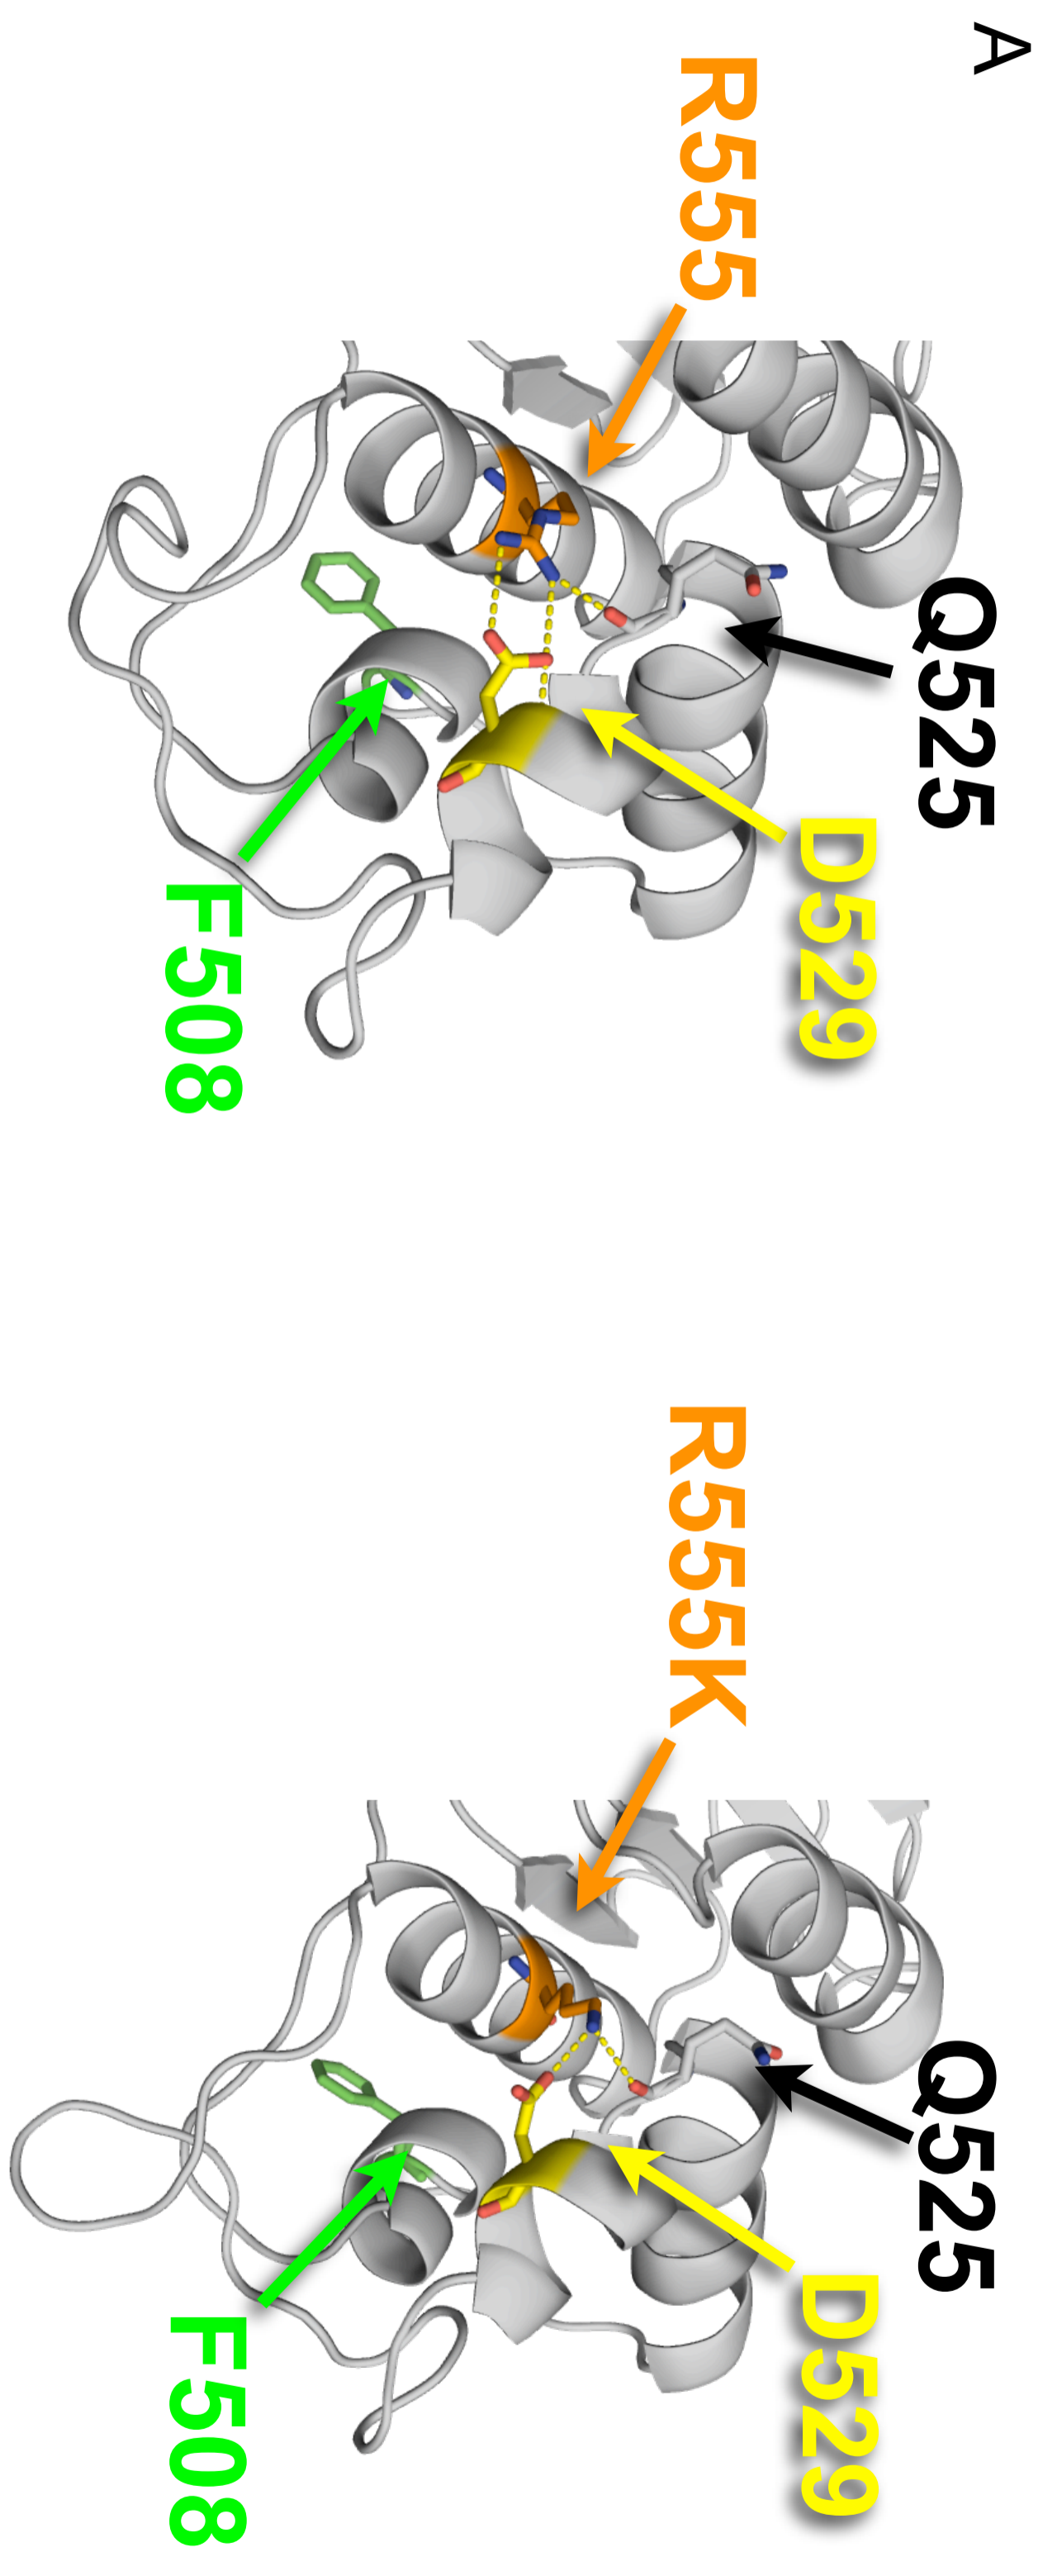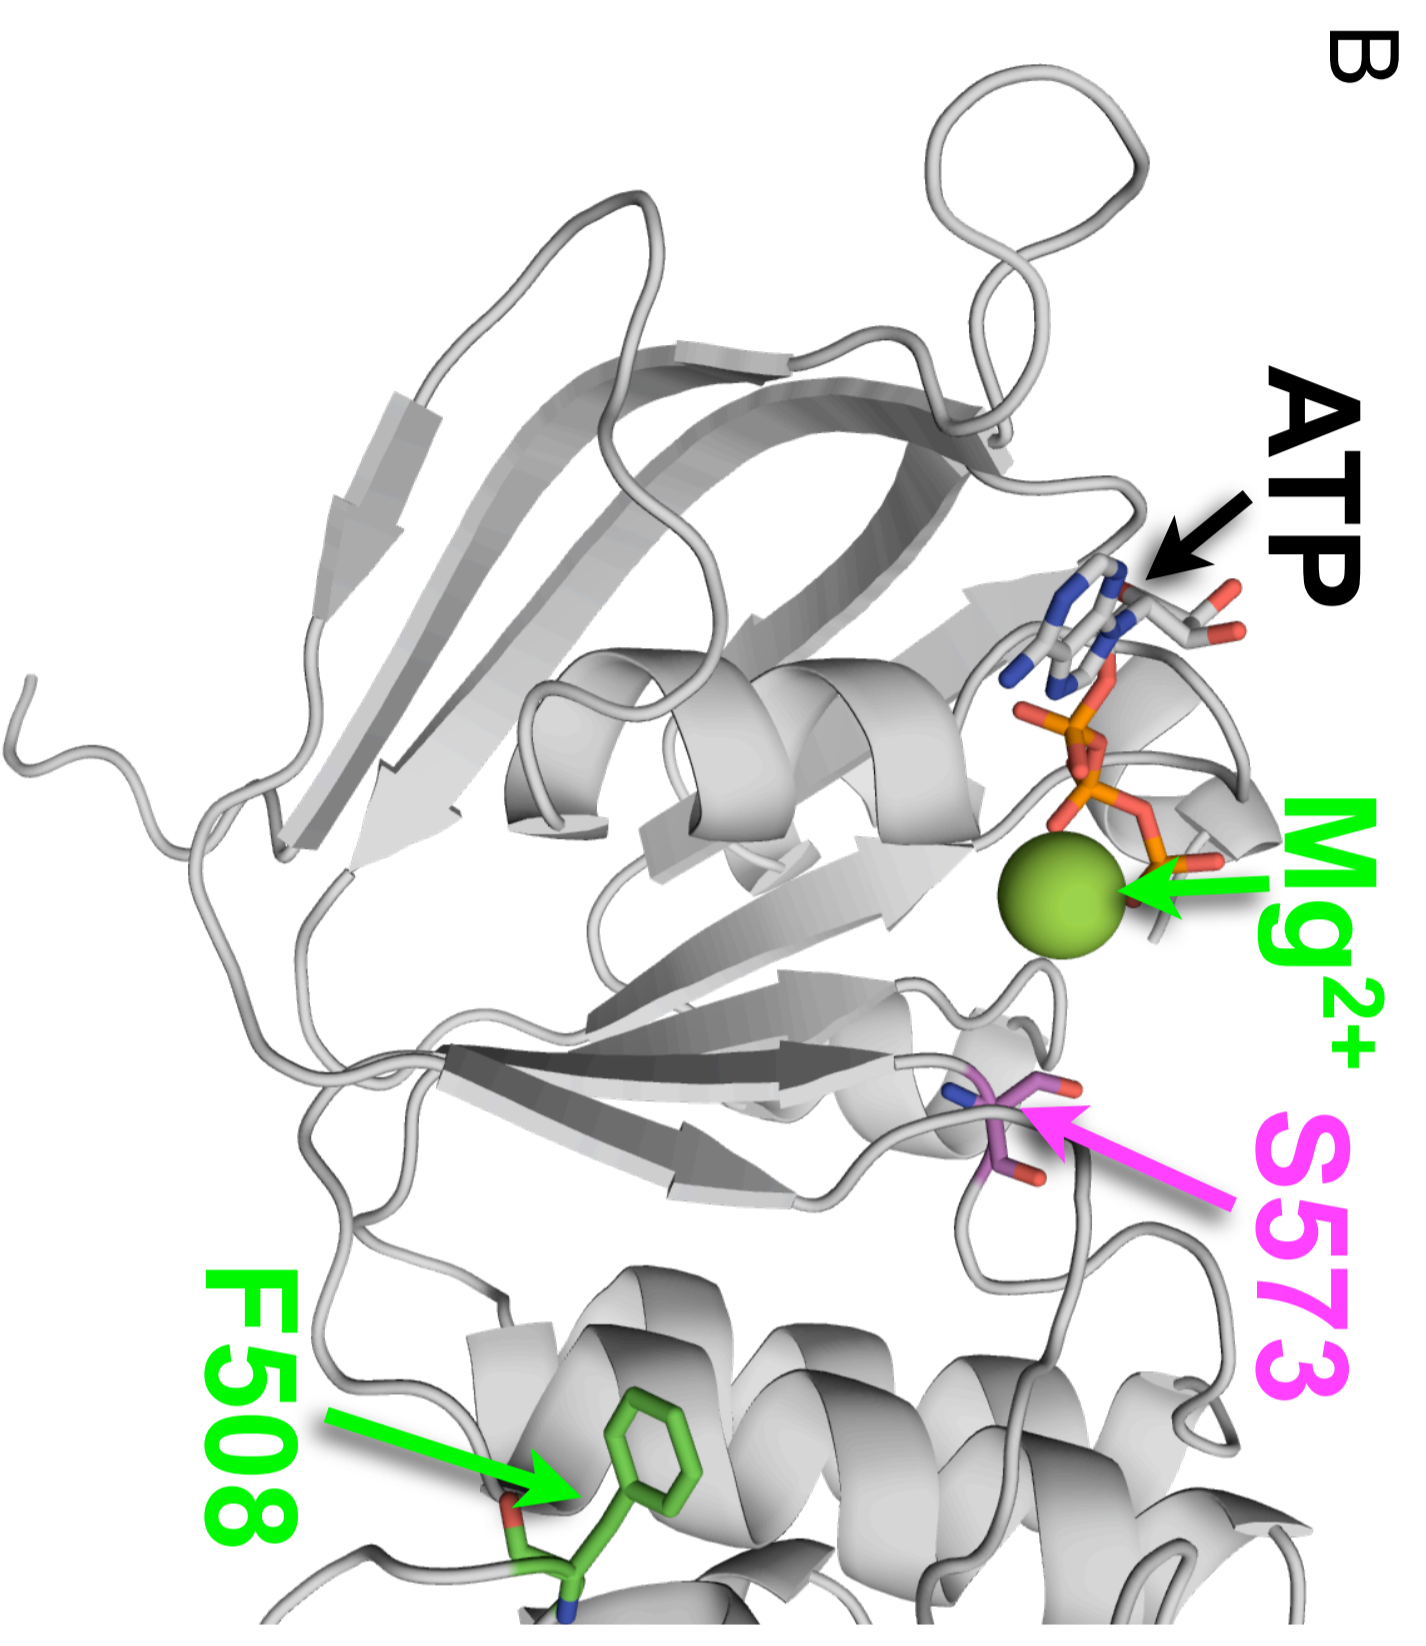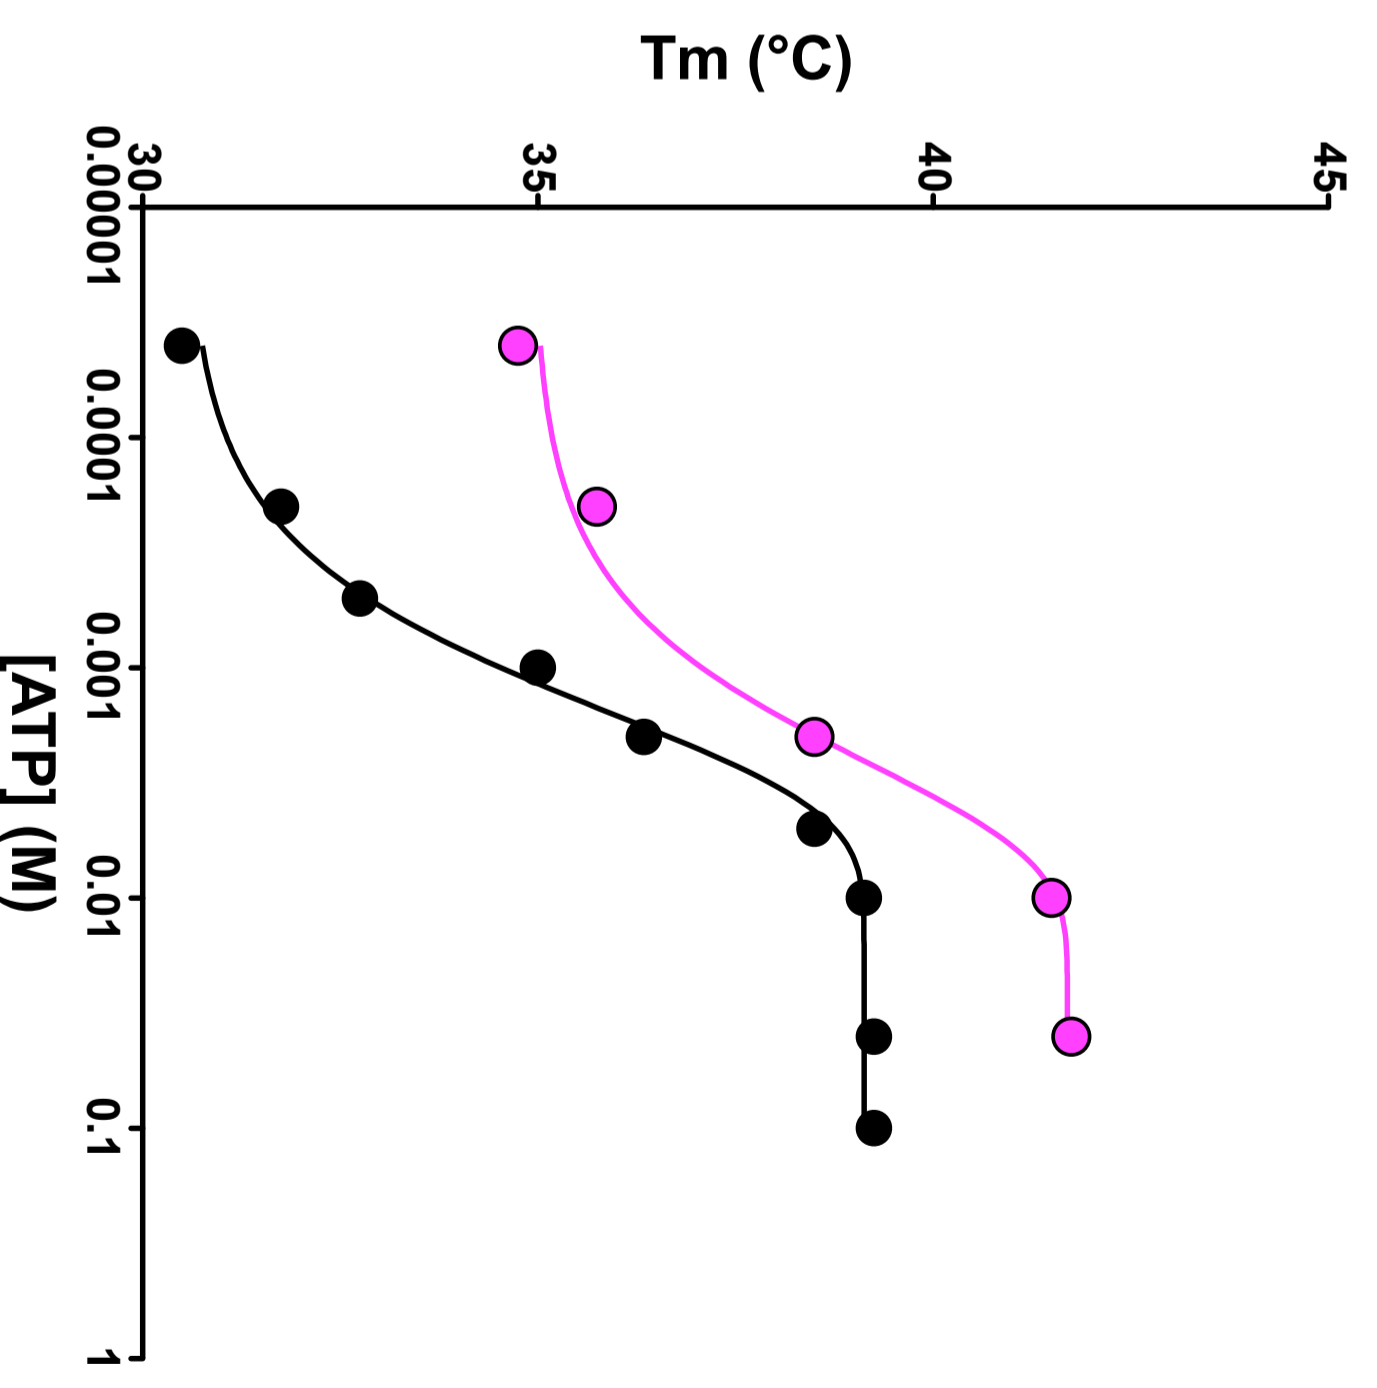

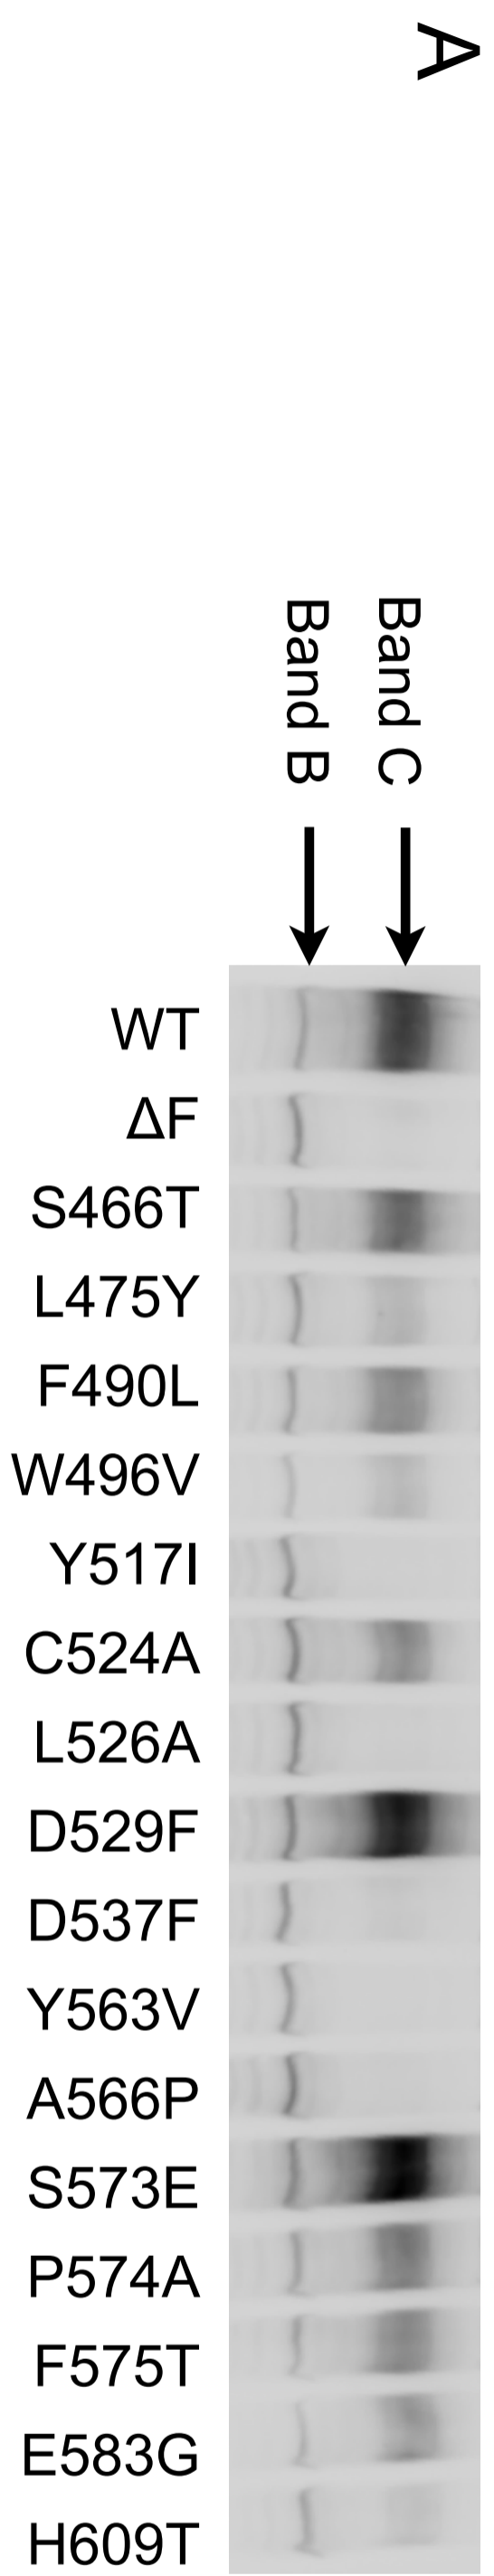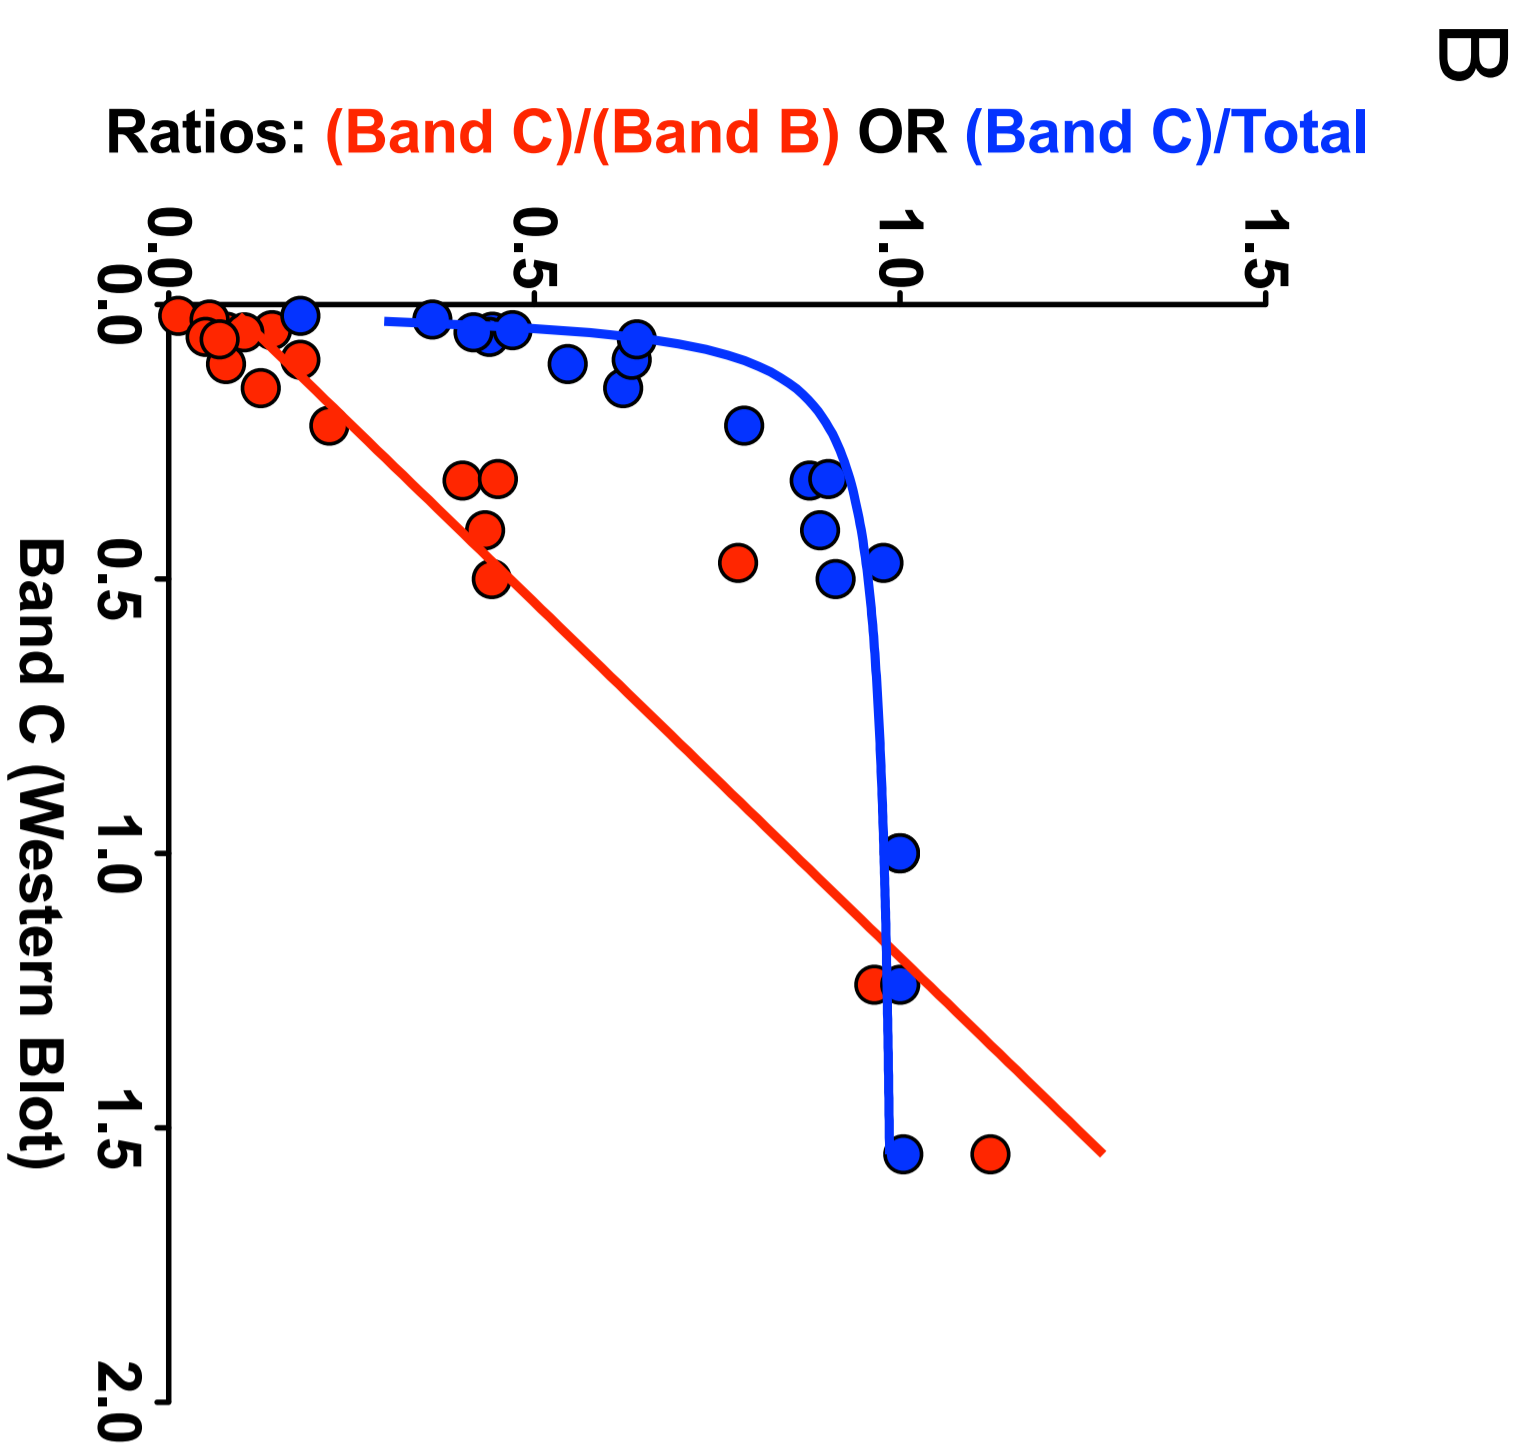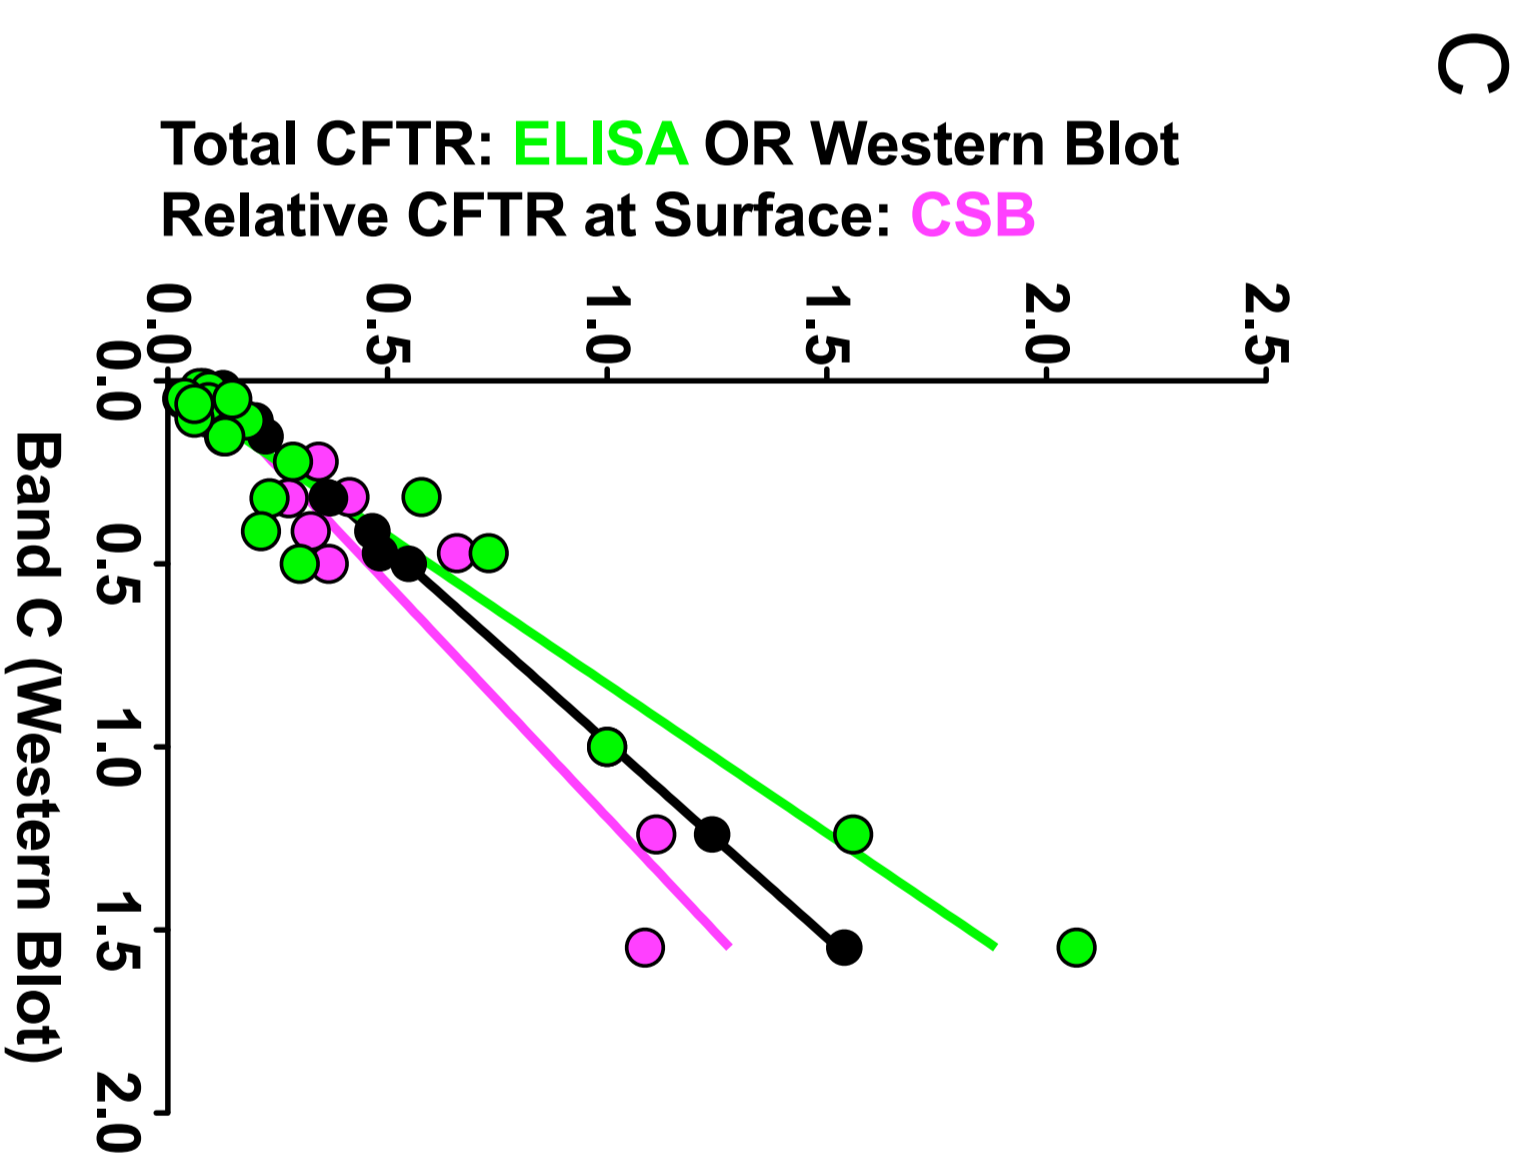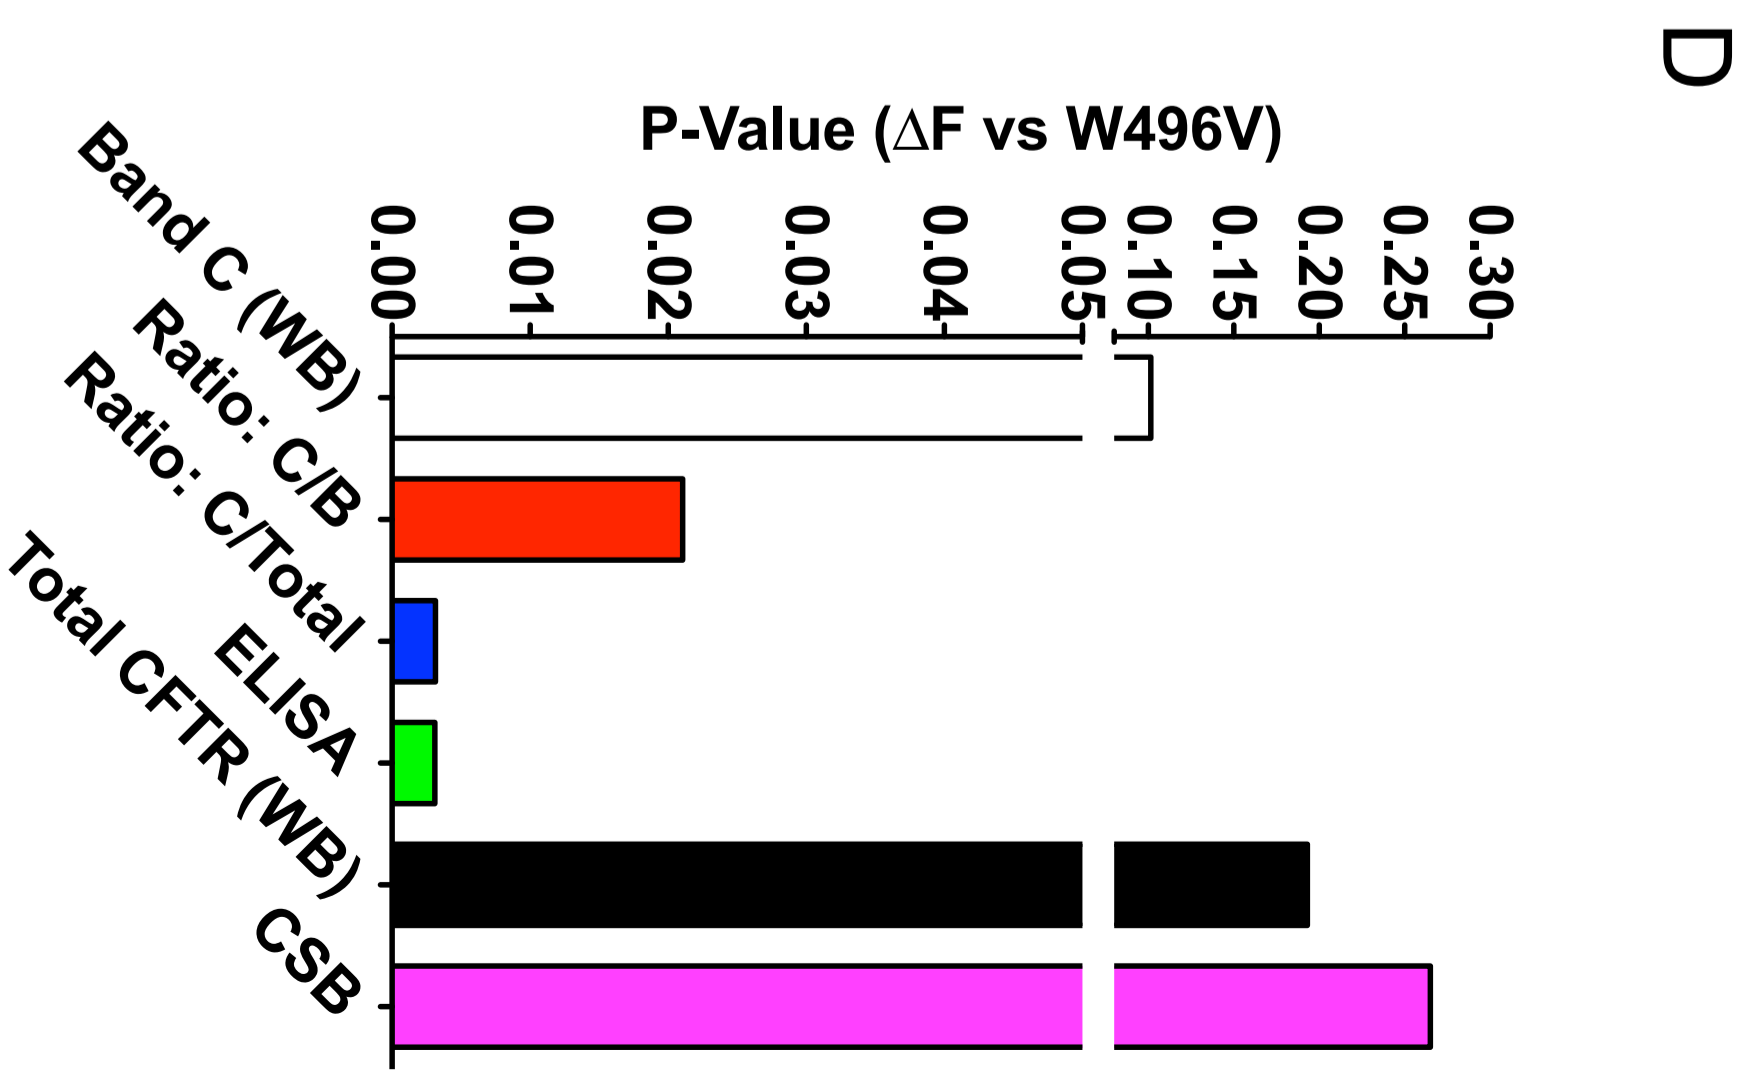

Supplement: NIHMS346324-supplement-02.pdf [file NIHMS346324-supplement-02.pdf]
